# Supplementary material for: A Conceptual Framework for the Assessment of Cumulative Exposure to Air Pollution at a Fine Spatial Scale
Source: MDPI journal article supplement (doi:10.3390/ijerph13030319), 2016-03-15
Supplement: s1 [file s1]

# Supplementary Materials: A Conceptual Framework for the Assessment of Cumulative Exposure to Air Pollution at a Fine Spatial Scale

Wahida Kihal-Talantikite, Cindy M. Padilla, Denis Zmirou-Navier, Olivier Blanchard, Geraldine Le Nir, Philippe Quenel and Séverine Deguen

| Mobility matrix  | arrondissement0 | arrondissement1 | arrondissement2 | arrondissement3 | arrondissement4 | arrondissement5 | arrondissement6 | arrondissement7 | arrondissement8 | arrondissement9 | arrondissement10 | arrondissement11 | arrondissement12 | arrondissement13 | arrondissement14 | arrondissement15 | arrondissement16 | arrondissement17 | arrondissement18 | arrondissement19 | arrondissement20 | arrondissement21 | arrondissement22 | arrondissement23 | arrondissement24 | arrondissement25 | arrondissement26 | arrondissement27 | arrondissement28 | arrondissement29 | Total  |
|------------------|-----------------|-----------------|-----------------|-----------------|-----------------|-----------------|-----------------|-----------------|-----------------|-----------------|------------------|------------------|------------------|------------------|------------------|------------------|------------------|------------------|------------------|------------------|------------------|------------------|------------------|------------------|------------------|------------------|------------------|------------------|------------------|------------------|--------|
| arrondissement10 |                 | 1175            | 393             | 365             | 355             | 464             | 281             | 483             | 1203            | 712             | 126              | 719              | 382              | 552              | 220              | 229              | 180              | 117              | 112              | 667              |                  |                  |                  |                  |                  |                  |                  |                  |                  |                  | 8735   |
| arrondissement11 | 1043            |                 | 1355            | 888             | 635             | 984             | 422             | 507             | 875             | 866             | 197              | 1433             | 513              | 613              | 635              | 586              | 336              | 204              | 123              | 438              |                  |                  |                  |                  |                  |                  |                  |                  |                  |                  | 12653  |
| arrondissement12 | 447             | 1822            |                 | 1122            | 499             | 807             | 317             | 452             | 619             | 770             | 121              | 1412             | 120              | 206              | 279              | 584              | 165              | 189              |                  | 170              |                  |                  |                  |                  |                  |                  |                  |                  |                  |                  | 10101  |
| arrondissement13 | 503             | 1086            | 885             |                 | 1405            | 1267            | 470             | 492             | 768             | 822             | 118              | 930              |                  | 184              | 236              | 1226             | 244              | 313              | 158              | 151              |                  |                  |                  |                  |                  |                  |                  |                  |                  |                  | 11258  |
| arrondissement14 | 355             | 511             | 490             | 1195            |                 | 1850            | 596             | 516             | 619             | 485             | 109              | 631              |                  | 153              | 121              | 722              | 743              | 445              | 156              | 220              |                  |                  |                  |                  |                  |                  |                  |                  |                  |                  | 9917   |
| arrondissement15 | 492             | 743             | 795             | 1182            | 2091            |                 | 1853            | 1133            | 913             | 660             | 144              | 622              |                  | 254              | 191              | 654              | 832              | 1039             | 379              | 467              |                  |                  |                  |                  |                  |                  |                  |                  |                  |                  | 14444  |
| arrondissement16 | 250             | 288             | 328             | 427             | 545             | 1937            |                 | 1122            | 402             | 353             | 115              | 273              |                  | 142              | 132              | 299              | 335              | 787              | 628              | 251              |                  |                  |                  |                  |                  |                  |                  |                  |                  |                  | 8614   |
| arrondissement17 | 378             | 727             | 526             | 549             | 608             | 1126            | 1400            |                 | 1948            | 750             | 101              | 574              | 187              | 304              | 126              | 264              | 163              | 371              | 866              | 666              |                  |                  |                  |                  |                  |                  |                  |                  |                  |                  | 11634  |
| arrondissement18 | 953             | 1304            | 641             | 765             | 584             | 1002            | 522             | 1983            |                 | 1272            |                  | 1283             | 236              | 299              | 174              | 407              | 167              | 222              | 260              | 1121             |                  |                  |                  |                  |                  |                  |                  |                  |                  |                  | 13195  |
| arrondissement19 | 1547            | 1610            | 456             | 687             | 422             | 715             | 419             | 763             | 1996            |                 |                  | 2189             | 185              | 324              | 205              | 276              | 113              | 123              |                  | 409              |                  |                  |                  |                  |                  |                  |                  |                  |                  |                  | 12439  |
| arrondissement1  |                 | 171             |                 |                 |                 |                 |                 | 108             |                 |                 |                  |                  | 119              |                  |                  | 106              |                  |                  |                  |                  |                  |                  |                  |                  |                  |                  |                  |                  |                  |                  | 504    |
| arrondissement20 | 1028            | 2844            | 1360            | 828             | 468             | 692             | 310             | 768             | 1960            | 2142            |                  |                  | 187              | 384              | 142              | 334              | 136              | 155              |                  | 376              |                  |                  |                  |                  |                  |                  |                  |                  |                  |                  | 14114  |
| arrondissement2  | 135             | 209             | 110             | 123             |                 | 140             | 112             | 175             | 204             |                 | 185              | 145              |                  | 144              | 121              |                  | 103              |                  |                  |                  |                  |                  |                  |                  |                  |                  |                  |                  |                  |                  | 1906   |
| arrondissement3  | 256             | 310             | 212             | 122             | 124             | 186             | 162             | 197             | 149             | 172             | 118              | 187              | 175              |                  | 309              | 133              | 135              |                  |                  | 127              |                  |                  |                  |                  |                  |                  |                  |                  |                  |                  | 3074   |
| arrondissement4  |                 | 206             | 138             | 135             | 106             | 180             | 137             | 172             | 121             | 155             |                  |                  |                  | 155              |                  | 106              | 130              |                  |                  |                  |                  |                  |                  |                  |                  |                  |                  |                  |                  |                  | 1741   |
| arrondissement5  | 187             | 259             | 204             | 707             | 448             | 331             | 263             | 209             | 217             | 224             |                  | 145              |                  | 205              | 214              |                  | 483              | 261              |                  | 134              |                  |                  |                  |                  |                  |                  |                  |                  |                  |                  | 4491   |
| arrondissement6  |                 | 111             |                 | 205             | 331             | 432             | 341             | 184             |                 |                 |                  |                  |                  |                  |                  | 317              |                  | 360              |                  |                  |                  |                  |                  |                  |                  |                  |                  |                  |                  |                  | 2281   |
| arrondissement7  |                 | 131             |                 | 165             | 189             | 866             | 521             | 284             | 125             |                 |                  | 135              |                  |                  |                  | 195              | 508              |                  | 228              |                  |                  |                  |                  |                  |                  |                  |                  |                  |                  |                  | 3347   |
| arrondissement8  | 163             | 100             |                 |                 |                 | 286             | 564             | 848             | 192             | 106             |                  | 131              |                  |                  |                  | 103              | 157              | 256              |                  | 309              |                  |                  |                  |                  |                  |                  |                  |                  |                  |                  | 3215   |
| arrondissement9  | 453             | 358             | 173             | 203             | 226             | 418             | 376             | 630             | 682             | 241             | 127              | 240              | 165              | 196              | 104              | 160              | 232              | 153              | 316              |                  |                  |                  |                  |                  |                  |                  |                  |                  |                  |                  | 5453   |
| Total            | 8190            | 13965           | 8066            | 9668            | 9036            | 13683           | 9066            | 11026           | 12993           | 9730            | 1461             | 11049            | 2269             | 4115             | 3209             | 6701             | 5162             | 4995             | 3226             | 5506             |                  |                  |                  |                  |                  |                  |                  |                  |                  |                  | 153116 |

**Figure S1.** Description of the population movement inside the study area\*. Note:\* The mobility matrix describes the number of people residing in a given arrondissement in 2006 (in column) who resided in other arrondissements 5 years before (in line).

© 2016 by the authors; licensee MDPI, Basel, Switzerland. This article is an open access article distributed

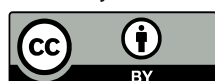

under the terms and conditions of the Creative Commons by Attribution (CC-BY) license (<http://creativecommons.org/licenses/by/4.0/>).
